# Supplementary material
Source: PubMed Central journal article supplement (PMC8990374)
Supplement: bloodBLD2021014205-suppl1.pdf [file bloodBLD2021014205-suppl1.pdf]

## Supplemental Materials

Topfer et al, Disrupting the adult-globin promoter alleviates promoter competition and reactivates foetal-globin gene expression.

**Supplementary Table 1:** sgRNA nucleotide sequence information

| Guide name  | Oligo Number | Fwd/Rev | Nucleotide sequence       |
|-------------|--------------|---------|---------------------------|
| -98 guide   | A9675        | Fwd     | CACCGATCACTTAGACCTCACCTG  |
|             | A9676        | Rev     | AAACCAGGGTGAGGTCTAAGTGATC |
| -90 guide   | A97          | Fwd     | CACCGATTGGCCAACCCTAGGGTG  |
|             | A98          | Rev     | AAACCACCCTAGGGTTGGCCAATC  |
| -84 guide   | B99          | Fwd     | CACCGGAGTAGATTGGCCAACCCT  |
|             | B100         | Rev     | AAACAGGGTTGGCCAATCTACTCC  |
| -21 guide   | A9470        | Fwd     | CACCGCAGGGCTGGGCATAAAAGTC |
|             | A9471        | Rev     | AAACGACTTTTATGCCAGCCCTGC  |
| +10 guide   | A9425        | Fwd     | CACCGAAGCAAATGTAAGCAATAGA |
|             | A9426        | Rev     | AAACTCTATTGCTTACATTTGCTTC |
| +68 guide   | A9677        | Fwd     | CACCGGTAACGGCAGACTTCTCCTC |
|             | A9678        | Rev     | AAACGAGGAGAAGTCTGCCGTTAC  |
| +1561 guide | A9427        | Fwd     | CACCGAGGCAGAATCCAGATGCTCA |
|             | A9428        | Rev     | AAACTGAGCATCTGGATTCTGCCTC |

**Supplementary Table 2:** Single stranded oligo nucleotide donor sequences

| Deletion                     | ssOND sequence                                                                                                                                                      |
|------------------------------|---------------------------------------------------------------------------------------------------------------------------------------------------------------------|
| <i>HBB</i> promoter deletion | GGCTGAGGGTTTGAAGTCCAACCTCCTAAGCCAGTGCCAGAAGAGCC<br>AAGGACAGGTACGGCTGTCATCACTTAGATCAAACAGACACCATGG<br>TGCATCTGACTCCTGAGGAGAAGTCTGCCGTTACTGCCCTGTGGGGC<br>AAGGTGAACGT |
| <i>HBB</i> gene deletion     | CAATCTACTCCCAGGAGCAGGGAGGGCAGGAGCCAGGGCTGGGCAT<br>AAAAGTCAGGGCGAGCCATCTATTGCTTTGATGTATTTAAATTATTT<br>CTGAATATTTTACTAAAAAGGGAATGTGGGAGGTCAGTGCATTTAA<br>ACATAAAGA    |

**Supplementary Table 3:** qPCR primer sequences used for determining mRNA expression of the  $\beta$ -like globin genes

| Primer name             | Primer number | Primer sequence         |
|-------------------------|---------------|-------------------------|
| <i>I8s</i> qPCR forward | A1560         | CACGGCCGGTACAGTGAAAC    |
| <i>I8s</i> qPCR reverse | A1561         | AGAGGAGCGAGCGACCAA      |
| <i>HBG</i> qPCR forward | A2524         | CCTGTCCTCTGCCTCTGCC     |
| <i>HBG</i> qPCR forward | A2525         | GGATTGCCAAAACGGTCAC     |
| <i>HBB</i> qPCR forward | A4069         | TGTCCACTCCTGATGCTGTTATG |
| <i>HBB</i> qPCR reverse | A4070         | GGCACCGAGCACTTTCTTG     |

**Supplementary Table 4:** Primer sequences used for PCR screening and Sanger sequencing

| Primer number | Primer sequence          | Screening purpose                                                                                               |
|---------------|--------------------------|-----------------------------------------------------------------------------------------------------------------|
| A9595         | GAGGGTTTGAAGTCCAACCTCCTA | Forward screening primer <i>HBB</i> promoter deletion and mutations;<br>Forward primer <i>HBB</i> gene deletion |
| A9617         | TCCACATGCCAGTTTCTATTG    | Reverse screening primer <i>HBB</i> promoter deletion and mutations                                             |
| A9578         | AGGGATGAATAAGGCATATGCAT  | Reverse screening primer <i>HBB</i> gene deletion                                                               |

**Supplementary Table 5:** Copy number qPCR primers used to determine number of copies of sections of chromosomal DNA.

| Name                                   | Primer number | Fwd/Rev | Sequence                  |
|----------------------------------------|---------------|---------|---------------------------|
| <i>HS2</i> copy number primer          | A5581         | Fwd     | CATCACTCTAGGCTGAGAACATCTG |
|                                        | A5582         | Rev     | GGCTCAAGCACAGCAATGC       |
| <i>HBB</i> promoter copy number primer | B44           | Fwd     | CTAGGGTTGGCCAATCTACTCC    |
|                                        | B45           | Rev     | CTCTGCCCTGACTTTTATGCC     |
| <i>HBB</i> gene copy number primer     | A9681         | Fwd     | CAGAGGTTCTTTGAGTCCTTTGG   |
|                                        | A9684         | Rev     | GAAGGGGAAAGAAAACATCAAGC   |

**Supplementary Table 6:** Western blot antibodies

| Antibody                                                   | Clone | Manufacturer      | Catalog # |
|------------------------------------------------------------|-------|-------------------|-----------|
| Haemoglobin $\gamma$ antibody                              | 51-7  | <i>Santa Cruz</i> | sc-21756  |
| Haemoglobin $\beta$ antibody                               | 37-8  | <i>Santa Cruz</i> | sc-21757  |
| HBA antibody: Rabbit Anti-Human                            |       | <i>Home Made</i>  |           |
| Monoclonal Anti- $\beta$ -Actin antibody produced in mouse |       | <i>Sigma</i>      | A2228     |

**Supplementary Table 7:** Flow cytometry antibodies

| Antibody                     | Clone              | Manufacturer                      | Catalog #       |
|------------------------------|--------------------|-----------------------------------|-----------------|
| FITC Mouse Anti-Human CD235a | GA-R2 (HIR2) (RUO) | <i>BD Pharmingen<sup>TM</sup></i> | 559943          |
| PE Anti-Human CD49d          | 9F10               | <i>BioLegend</i>                  | 304304          |
| APC Anti-Human Band3         |                    | <i>New York Blood</i>             | Gift from X. An |

**Supplementary Table 8: Probes for Capture-C**

| Target          | Sequence                                                                                  |
|-----------------|-------------------------------------------------------------------------------------------|
| HS3<br>enhancer | CTGAAAACATAGGAGTCAAGGCACTTGCCCCTAGCTGGGGGTATAGGG<br>GAGCAGTCCCATGTAGTAGTAGAATGA           |
|                 | AGGAGTCAAGGCACTTGCCCCTAGCTGGGGGTATAGGGGAGCAGTCCC<br>ATGTAGTAGTAGAATGAAAAATGCTGC           |
|                 | GCACTTGCCCCTAGCTGGGGGTATAGGGGAGCAGTCCCATGTAGTAGTA<br>GAATGAAAAATGCTGCTATGCTGTGC           |
|                 | CTAGCTGGGGGTATAGGGGAGCAGTCCCATGTAGTAGTAGAATGAAAA<br>ATGCTGCTATGCTGTGCCTCCCCACC            |
|                 | GTATAGGGGAGCAGTCCCATGTAGTAGTAGAATGAAAAATGCTGCTAT<br>GCTGTGCCTCCCCACCTTTCCCATGT            |
|                 | TACAGTCATAGACTTCTTCATGGCTGTCTCCTTTATCCACAGAATGATTC<br>CTTTGCTTCATTGCCCCATCCATCT           |
|                 | TCCTGCTCCCAAATTTACAGTCATAGACTTCTTCATGGCTGTCTCCTTTA<br>TCCACAGAATGATTCCTTTGCTTCATTGCC      |
|                 | CAAGTCCTTAGAGACTCCTGCTCCCAAATTTACAGTCATAGACTTCTTCA<br>TGGCTGTCTCCTTTATCCACAGAATGATTCCTTTG |
|                 | CCTTGAAATCCAAGTCCTTAGAGACTCCTGCTCCCAAATTTACAGTCAT<br>AGACTTCTTCATGGCTGTCTCCTTTATCCAC      |
|                 | AGTCAAATTCCTTGAAATCCAAGTCCTTAGAGACTCCTGCTCCCAAAT<br>TTACAGTCATAGACTTCTTCATGGCTGTCTC       |

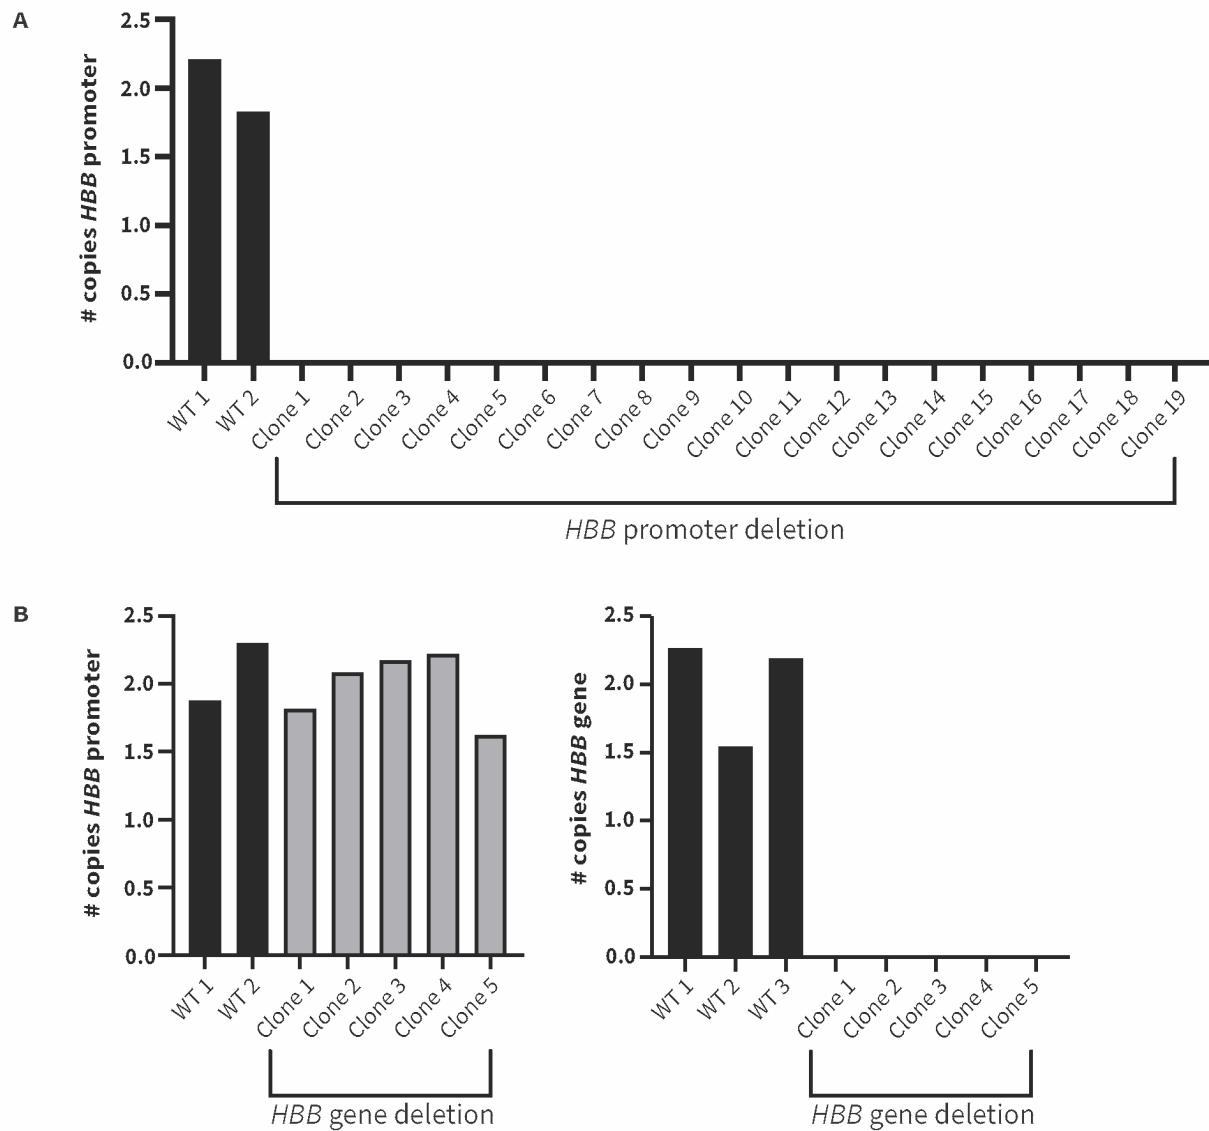

**Supplementary Figure 1: Analysis of the number of copies of the *HBB* region in *HBB* promoter deletion and *HBB* gene deletion clones.** The number of copies of the *HBB* promoter region or *HBB* gene region, relative to the number of copies of the hypersensitive site 2 (*HS-2*) locus control region (an upstream region on the same chromosome) was determined by qPCR from gDNA using primers described in Table S5. All data was normalised to the average number of copies of the *HBB* promoter region or *HBB* gene region relative to *HS-2* in two populations of WT clonal HUDEP-2 cells, which was set to a value of 2. (A) 19 *HBB* promoter deletion clones show no remaining copies of the *HBB* promoter region, suggesting that this region has been homozygously deleted in these clonal populations. (B) 5 *HBB* gene deletion clones show 2 copies of the *HBB* promoter region (left) and no remaining copies of the *HBB* gene region (right), suggesting that the *HBB* gene region has been homozygously deleted in these clonal populations but that the neighbouring *HBB* gene deletion has the expected 2 copies in each clone. This supports the hypothesis that these *HBB* gene deletion clones have had the *HBB* gene region deleted but do not contain larger deletions in either allele.

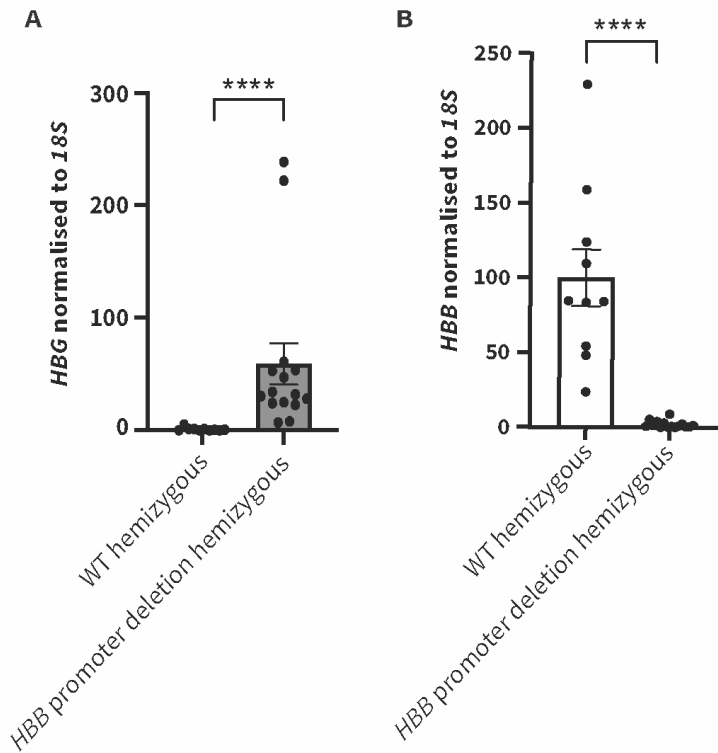

**Supplementary Figure 2: Deletion of the *HBB* promoter leads to increased expression of *HBG* and decreased expression of *HBB* in 2 which lack the entire  $\beta$ -like globin gene cluster on one chromosome ( $\Delta\epsilon\gamma\delta\beta$ ) and thus are hemizygous for the  $\beta$ -like globin gene cluster.**

Using the same strategy as that outlined in Figure 2A, the *HBB* promoter was deleted in HUDEP-2 cells which are hemizygous for the  $\beta$ -like globin gene cluster. *HBG* (A) and *HBB* (B) mRNA levels in WT hemizygous HUDEP-2 clonally sorted (n=10) and hemizygous HUDEP-2 cells with the *HBB* promoter deletion (n=15) (mean  $\pm$  standard error of the mean (SEM)). Significance was determined by a Mann-Whitney U test (\*\*\*\*P<0.0001).

| <u>HBB -98 gRNA ↓</u>                                                                 |             |
|---------------------------------------------------------------------------------------|-------------|
| ATCACTTAGACCTCACCCTGTGGAGCCACACCCTAGGGTTGGCCAATCTACT.....AGTCAGGGCAGAGCCATCTATTGCTTAC | WT          |
| ATCAC-----ACCCTAGGGTTGGCCAATCTACT.....AGTCAGGGCAGAGCCATCTATTGCTTAC                    | -24bp (18%) |
| ATCACTTAGACCT-----GTGGAGCCACACCCTAGGGTTGGCCAATCTACT.....AGTCAGGGCAGAGCCATCTATTGCTTAC  | -6bp (14%)  |
| ATCACTTAGACCT-----TAC                                                                 | -104bp (9%) |
| ATCACTTAGA-----GCCACACCCTAGGGTTGGCCAATCTACT.....AGTCAGGGCAGAGCCATCTATTGCTTAC          | -14bp (9%)  |
| A-----CACCCCTAGGGTTGGCCAATCTACT.....AGTCAGGGCAGAGCCATCTATTGCTTAC                      | -28bp (9%)  |
| ATCACTTAGACCT-----AGGGTTGGCCAATCTACT.....AGTCAGGGCAGAGCCATCTATTGCTTAC                 | -21bp (9%)  |

| <u>↓ HBB -90 gRNA</u>                                                                       |             |
|---------------------------------------------------------------------------------------------|-------------|
| GGAGCCACACCCTAGGGTTGGCCAATCTACTCCCAGGAGCAGGGAGGGCAGGAGCCAGGGCTGGGCATAAAAAGTCAGGGCAGAGCCATCT | WT          |
| GGAGCCA-----ATCTACTCCCAGGAGCAGGGAGGGCAGGAGCCAGGGCTGGGCATAAAAAGTCAGGGCAGAGCCATCT             | -17bp (38%) |
| GGAG-----GTTGGCCAATCTACTCCCAGGAGCAGGGAGGGCAGGAGCCAGGGCTGGGCATAAAAAGTCAGGGCAGAGCCATCT        | -12bp (13%) |
| GGAGCCA-----TCT                                                                             | -80bp (13%) |
| GGAGCC-----TAGGGTTGGCCAATCTACTCCCAGGAGCAGGGAGGGCAGGAGCCAGGGCTGGGCATAAAAAGTCAGGGCAGAGCCATCT  | -6bp (13%)  |
| GGAGCCACACC-----GTTGGCCAATCTACTCCCAGGAGCAGGGAGGGCAGGAGCCAGGGCTGGGCATAAAAAGTCAGGGCAGAGCCATCT | -5bp (13%)  |

| <u>↓ HBB -84 gRNA</u>                                                                      |            |
|--------------------------------------------------------------------------------------------|------------|
| GCCAAGGACAGGTACGGCTGTCATCACTTAGACCTCACCCTGTGGAGCCACACCCTAGG-----CCAATCTACTCCCAGGAGCAGGGAGG | WT         |
| GCCAAGGACAGGTACGGCTGTCATCACTTAGACCTCACCCTGTGGAGCCACACCCTAG--TTGGCCAATCTACTCCCAGGAGCAGGGAGG | -2bp (21%) |
| GCCAAGGACAGGTACGGCTGTCATCACTTAGACCTCACCCTGTGGAGCCACACCCTAGG-----GGAGCAGGGAGG               | -5bp (14%) |
| GCCAAGGACAGGTACGGCTGTCATCACTTAGACCTCACCCTGTGGAGCCACACCCTAGG--TGGCCAATCTACTCCCAGGAGCAGGGAGG | -2bp (11%) |
| GCCA-----GGAGCAGGGAGG                                                                      | -74bp (4%) |
| GCCAAGGACAGGTACGGCTGTCATCACTTAGACCTCACCCTGTGGAGCCACACCCTAGG-----AGCAGGGAGG                 | -21bp (4%) |
| GCCAAGGACAGGTACGGCTGTCATCACTTAGACCTCACCCTGTG-----GAGCAGGGAGG                               | -35bp (4%) |

| <u>HBB -21 gRNA ↓</u>                                                                      |             |
|--------------------------------------------------------------------------------------------|-------------|
| GCCAATCTACTCCCAGGAGCAGGGAGGGCAGGAGCCAGGGCTGGGCATAAAAAGTCAGGGCAGAGCCATCTATTGCTTACATTTGCTTCT | WT          |
| GCCAATCTACTCCCAGGAGCAGGGAGGGCAGGAGCCAGGGC-----AGAGCCATCTATTGCTTACATTTGCTTCT                | -19bp (50%) |
| GCCAATCTACTCCCAGGAGCAGGGAGGGCAGGAGCCAGGGCTGGGC-----CATCTATTGCTTACATTTGCTTCT                | -19bp (10%) |
| GCCAATCTACTCCCAGGAGCAGGGAGGGCAGGAGCC-----TCTATTGCTTACATTTGCTTCT                            | -30bp (10%) |
| GCCAATCTACTCCCAGGA-----AGTCAGGGCAGAGCCATCTATTGCTTACATTTGCTTCT                              | -33bp (10%) |

**Supplementary Figure 3: Top indels made following the use of guides -98, -90, -84 and -21 for CRISPR-Cas9 genome editing in HUDEP-2 cells.** The top sequence in each box represents the WT sequence prior to CRISPR-Cas9 genome editing. The location of the sgRNA has been placed above the WT sequence with the cut site indicated by an arrow. Known transcription factors have been indicated in the WT sequence in red. The sequences below the WT sequence represent the sequence following CRISPR-Cas9 genome editing. The number of base pairs that has been removed has been indicated to the right of each sequence followed by the percentage of cells analysed that contained this sequence.



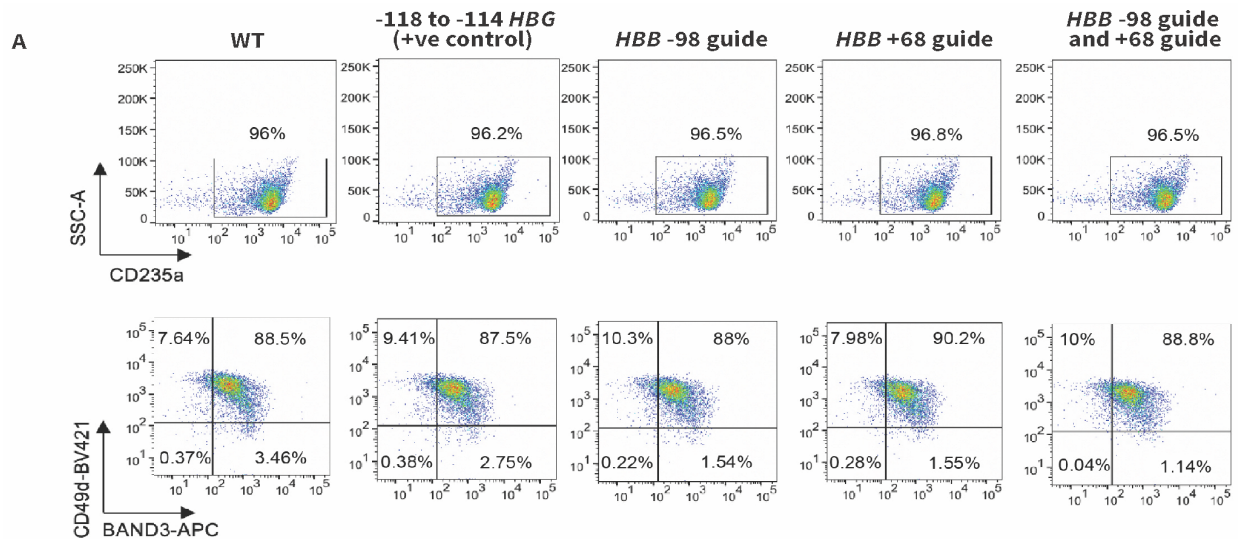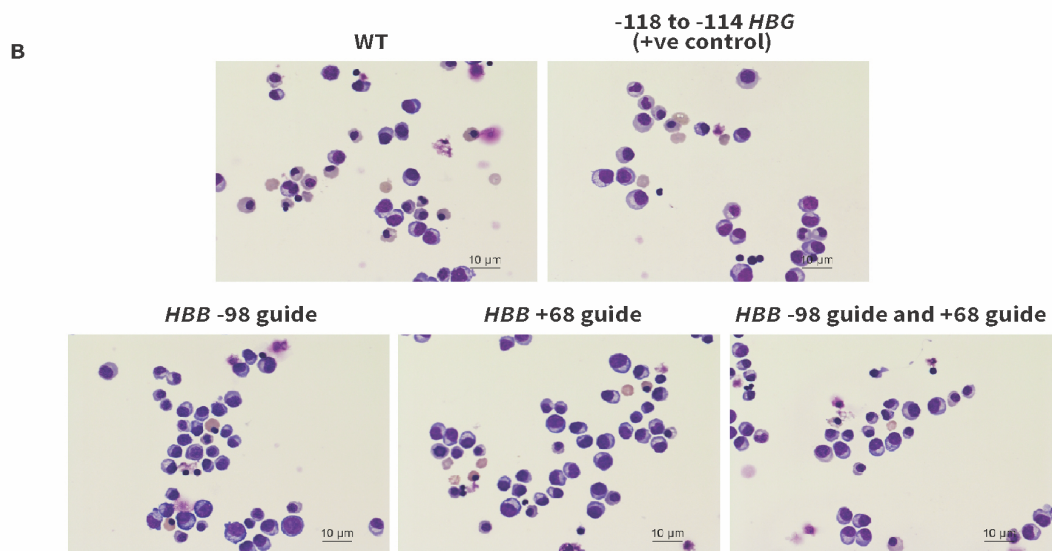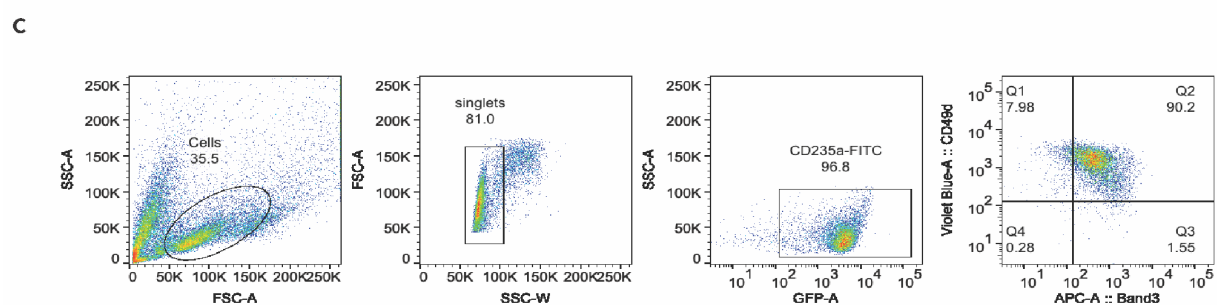

**Supplementary Figure 5: Flow cytometry and cell morphology of CD34<sup>+</sup> cells after differentiation.** (A) Erythroid maturation kinetics at CD34<sup>+</sup> erythroid culture 15 days after each type of editing as indicated on top, as determined by immune-flow cytometry measurement of CD235a positive ratio and CD49d and Band3 expression on erythroid cells. (B) Morphology of day 15 CD34<sup>+</sup> erythroid culture with RNP-edited groups indicated on top of each image. The images were acquired with a Nikon Eclipse Ni microscope with a 603 objective and Nikon NIS-Elements software (scale bars, 10 mm). (C) Gating strategy used for flow cytometry analysis.



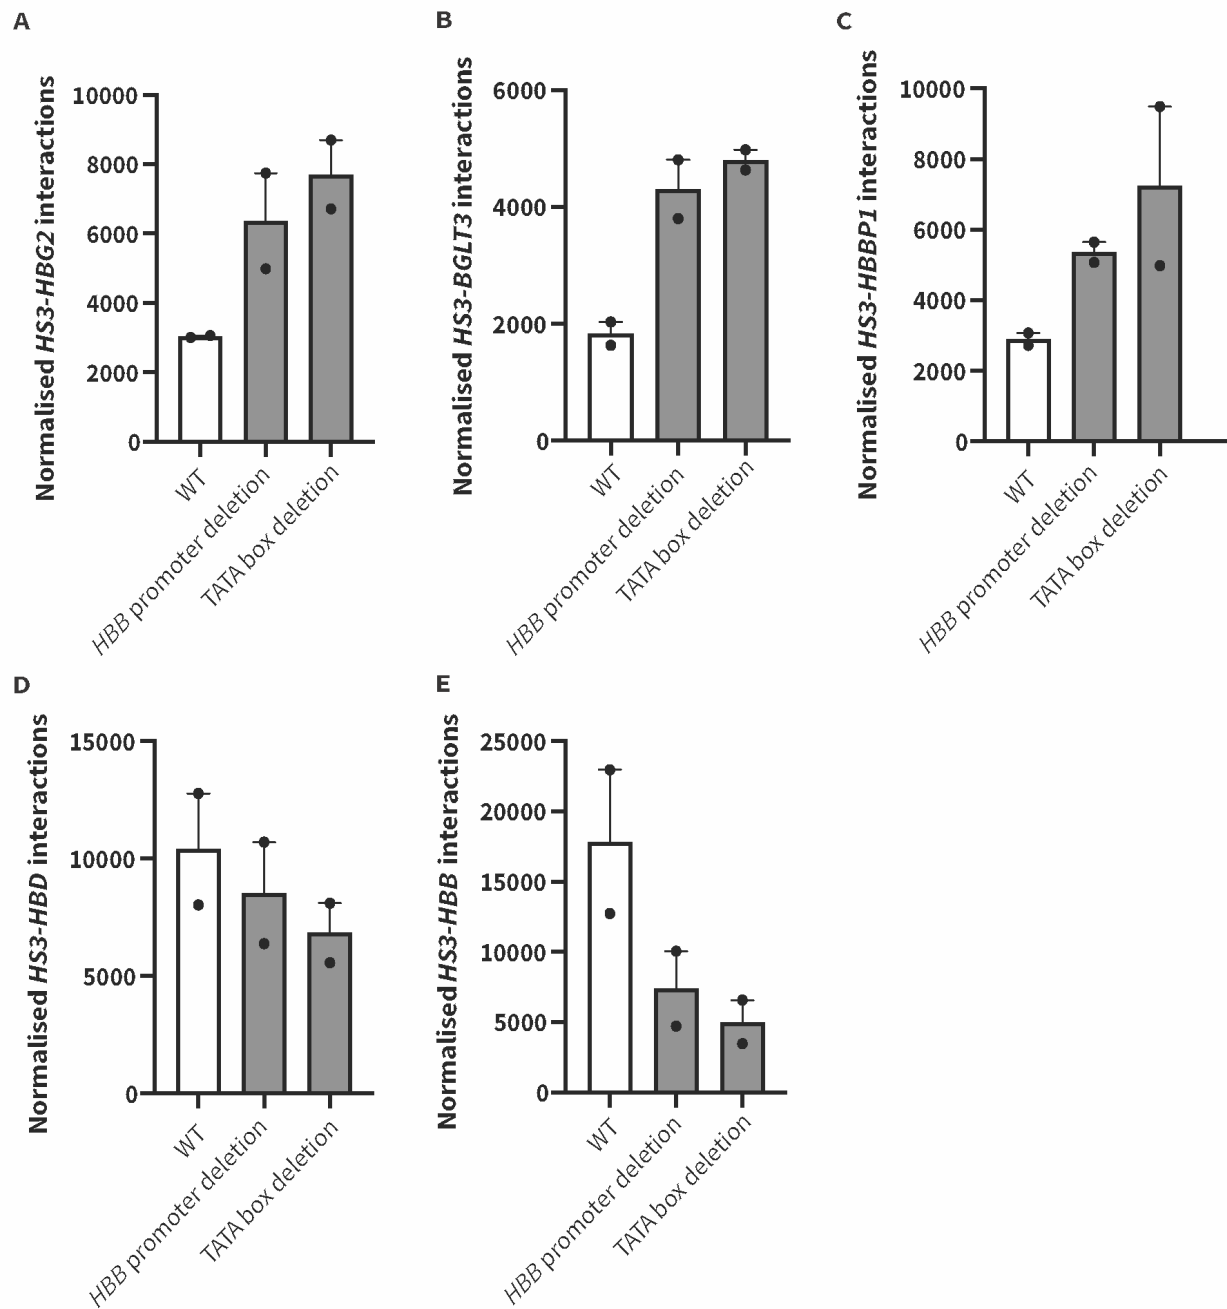

**Supplementary Figure 6: Deletion of the *HBB* promoter or disruption of the TATA box increases association of the Locus Control Region with *HBG2*, *BGLT3* and *HBBP1* and decreases association of the Locus Control Region with *HBB*.** Capture-C interactions of HS3 with (A) *HBG2* (chr11:5254441-5254919, hg38), (B) *BGLT3* (chr11:5244554-5245546, hg38), (C) *HBBP1* (chr11:5241954-5243592, hg38), (D) *HBD* (chr11:5233668-5235096, hg38) and (E) *HBB* (chr11:5226520-5228365, hg38), in clonal populations of WT HUDEP-2 cells, *HBB* promoter deletion cells and TATA box mutation cells (n=2). Interaction values have been normalised relative to total counts. Histograms represent mean data (+ range of values as the error bar) with individual datapoints shown as filled circles.
